# Supplementary material for: Rhythm Control and Cardiovascular or Cerebrovascular Outcomes in Patients with Atrial Fibrillation: A Study of the CODE-AF Registry
Source: MDPI journal article supplement (doi:10.3390/jcm12144579), 2023-07-10

## SUPPLEMENTARY MATERIAL

### *Rhythm control and cardiovascular or cerebrovascular outcomes in patients with atrial fibrillation*

Ho-Gi Chung; Junbeom Park; Jin-Kyu Park; Ki-Woon Kang; Jaemin Shim; Jin-Bae Kim; Jun Kim; Eue-Keun Choi; Hyung Wook Park; Young Soo Lee;  
Boyoung Joung

| Contents                                                                                                                                         | Page |
|--------------------------------------------------------------------------------------------------------------------------------------------------|------|
| <b>Supplementary Table S1.</b> Subgroup analysis of primary outcome in rate- and rhythm-control group before overlap weighting.                  | 2    |
| <b>Supplementary Table S2.</b> Baseline demographic characteristics between non-RFCA versus RFCA group in patients with rhythm control.          | 4    |
| <b>Supplementary Figure S1.</b> Cumulative incidence of primary outcome in rhythm and rate control treatment groups before overlap weighting.    | 6    |
| <b>Supplementary Figure S2.</b> Cumulative incidence of secondary outcomes in rhythm and rate control treatment groups before overlap weighting. | 7    |

**Supplementary Table S1.** Subgroup analysis of primary outcome in rate- and rhythm-control group before overlap weighting.

|                                              | Rate control (N=4,506) |        |                | Rhythm control (N=2,164) |       |                |                  |         |                   |
|----------------------------------------------|------------------------|--------|----------------|--------------------------|-------|----------------|------------------|---------|-------------------|
|                                              | Event, n               | PYRs   | Event/100 PYRs | Event, n                 | PYRs  | Event/100 PYRs | HR (95% CI)      | P-value | P for interaction |
| Sex                                          |                        |        |                |                          |       |                |                  |         |                   |
| Male (N=4,152)                               | 123                    | 7,184  | 1.7            | 52                       | 3,443 | 1.5            | 0.82 (0.59~1.14) | 0.233   | 0.252             |
| Women (N=2,518)                              | 88                     | 4,854  | 1.8            | 20                       | 1,771 | 1.1            | 0.57 (0.35~0.93) | 0.023   |                   |
| Age                                          |                        |        |                |                          |       |                |                  |         |                   |
| Age<75 (N=4,536)                             | 100                    | 7,803  | 1.3            | 48                       | 4,031 | 1.2            | 0.86 (0.61~1.22) | 0.398   | 0.570             |
| Age≥75 (N=2,134)                             | 111                    | 4,236  | 2.6            | 24                       | 1,183 | 2.0            | 0.73 (0.47~1.13) | 0.161   |                   |
| Onset of AF                                  |                        |        |                |                          |       |                |                  |         |                   |
| <3 month (N=1,263)                           | 17                     | 859    | 2.0            | 8                        | 424   | 1.9            | 0.93 (0.40~2.15) | 0.857   | 0.376             |
| ≥3 month (N=5,407)                           | 194                    | 11,179 | 1.7            | 64                       | 4,790 | 1.3            | 0.71 (0.54~0.94) | 0.019   |                   |
| CHA <sub>2</sub> DS <sub>2</sub> -VASc score |                        |        |                |                          |       |                |                  |         |                   |
| ≤2 (N=2,742)                                 | 45                     | 4,575  | 1.0            | 23                       | 2,760 | 0.8            | 0.74 (0.45~1.23) | 0.242   | 0.598             |
| ≥3 (N=3,928)                                 | 166                    | 7,464  | 2.2            | 49                       | 2,454 | 2.0            | 0.87 (0.63~1.19) | 0.376   |                   |
| Previous stroke history                      |                        |        |                |                          |       |                |                  |         |                   |
| Yes (N=1,231)                                | 69                     | 2,228  | 3.1            | 19                       | 825   | 2.3            | 0.75 (0.45~1.25) | 0.275   | 0.967             |
| No (N=5,432)                                 | 142                    | 9,799  | 1.5            | 53                       | 4,384 | 1.2            | 0.76 (0.55~1.04) | 0.084   |                   |
| HF history                                   |                        |        |                |                          |       |                |                  |         |                   |
| Yes (N=791)                                  | 39                     | 1,306  | 3.0            | 16                       | 613   | 2.6            | 0.81 (0.45~1.46) | 0.491   |                   |

|                            |     |        |     |    |       |     |                  |       |       |
|----------------------------|-----|--------|-----|----|-------|-----|------------------|-------|-------|
| No (N=5,836)               | 170 | 10,646 | 1.6 | 55 | 4,578 | 1.2 | 0.70 (0.52~0.95) | 0.021 | 0.357 |
| Left atrial diameter (LAD) |     |        |     |    |       |     |                  |       |       |
| LAD≤4cm (N=1,551)          | 41  | 2,445  | 1.7 | 17 | 1,360 | 1.3 | 0.75 (0.43~1.33) | 0.327 | 0.278 |
| LAD>4cm (N=3,993)          | 144 | 6,925  | 2.1 | 44 | 2,771 | 1.6 | 0.76 (0.54~1.06) | 0.104 |       |
| LAVI (mL/m <sup>2</sup> )  |     |        |     |    |       |     |                  |       |       |
| LAVI≤36 (N=1,202)          | 34  | 2,096  | 1.6 | 10 | 908   | 1.1 | 0.67 (0.33~1.36) | 0.268 | 0.934 |
| LAVI>36 (N=2,942)          | 118 | 5,182  | 2.3 | 30 | 1,944 | 1.5 | 0.66 (0.45~0.99) | 0.045 |       |
| LVEF                       |     |        |     |    |       |     |                  |       |       |
| LVEF≤40 (N=310)            | 12  | 474    | 2.5 | 3  | 250   | 1.2 | 0.48 (0.14~1.71) | 0.258 | 0.490 |
| LVEF>40 (N=5,329)          | 175 | 9,058  | 1.9 | 59 | 3,967 | 1.5 | 0.77 (0.57~1.03) | 0.081 |       |

AF = atrial fibrillation; CI = confidence interval; HF = heart failure; HR = hazard ratio; LAVI = left atrial volume index; LVEF = left ventricular ejection fraction; PYRs = person-years.

**Supplementary Table S2.** Baseline demographic characteristics between non-RFCA versus RFCA group in patients with rhythm control.

|                                              | Non-RFCA<br>(N=1,742) | RFCA<br>(N=422) | P-value |
|----------------------------------------------|-----------------------|-----------------|---------|
| Age in years                                 | 66.5 (12.6)           | 64.1 (9.8)      | 0.001   |
| Male                                         | 1,129 (64.8)          | 310 (73.6)      | 0.002   |
| Body mass index, kg/m <sup>2</sup>           | 24.8 (3.2)            | 25.3 (3.2)      | 0.017   |
| Systolic BP, mmHg                            | 124.8 (15.8)          | 124.1 (13.5)    | 0.606   |
| Diastolic BP, mmHg                           | 75.4 (12.0)           | 74.9 (11.0)     | 0.706   |
| Heart rate, beats/min                        | 76.3 (17.4)           | 72.5 (15.4)     | 0.001   |
| Type of AF                                   |                       |                 | 0.041   |
| Paroxysmal                                   | 1,081 (62.1)          | 237 (56.3)      |         |
| Persistent                                   | 639 (36.7)            | 183 (43.5)      |         |
| Permanent                                    | 22 (1.3)              | 1 (0.2)         |         |
| Onset of AF                                  |                       |                 | 0.001   |
| <3 month                                     | 409 (23.5)            | 24 (5.7)        |         |
| ≥3 month                                     | 1,333 (76.5)          | 397 (94.3)      |         |
| Alcohol intake*                              | 518 (29.7)            | 128 (30.4)      | 0.974   |
| Current smoking                              | 580 (33.3)            | 136 (32.3)      | 0.720   |
| CHA <sub>2</sub> DS <sub>2</sub> -VASc score | 2.6 (1.6)             | 2.3 (1.5)       | 0.001   |
| HAS BLEED Score**                            | 1.8 (1.1)             | 1.5 (1.0)       | 0.001   |
| Hypertension                                 | 1,138 (65.4)          | 274 (65.1)      | 0.648   |
| Diabetes                                     | 467 (26.8)            | 103 (24.4)      | 0.783   |
| Dyslipidemia                                 | 587 (33.7)            | 127 (30.2)      | 0.329   |
| Myocardial infarction                        | 67 (3.9)              | 10 (2.4)        | 0.659   |
| Congestive heart failure                     | 214 (12.3)            | 44 (10.5)       | 0.566   |
| Peripheral vascular disease                  | 102 (5.9)             | 26 (6.2)        | 0.985   |
| Stroke                                       | 270 (15.5)            | 64 (15.2)       | 0.201   |
| CKD***                                       | 157 (9.0)             | 34 (8.1)        | 0.983   |
| Medications                                  |                       |                 |         |

|              |              |            |       |
|--------------|--------------|------------|-------|
| NOAC         | 1,308 (75.1) | 321 (76.2) | 0.751 |
| Warfarin     | 518 (29.7)   | 125 (29.5) | 0.805 |
| Antiplatelet | 261 (15.0)   | 46 (10.9)  | 0.092 |
| Beta-blocker | 802 (46.1)   | 225 (53.4) | 0.016 |
| CCB          | 458 (26.3)   | 94 (22.3)  | 0.203 |
| Digitalis    | 60 (3.4)     | 5 (1.2)    | 0.050 |
| Diuretics    | 127 (7.3)    | 30 (7.1)   | 0.953 |
| ACEi/ARB     | 735 (42.2)   | 155 (36.8) | 0.063 |
| Statin       | 642 (36.9)   | 161 (38.2) | 0.377 |

Values are presented as mean (standard deviation) or number (%).

\*Social drinking and drinking were considered as alcohol intake.

\*\*Modified HAS-BLED=hypertension, 1 point: >65 years old, 1 point: stroke history, 1 point: bleeding history or predisposition, 1 point: liable international normalized ratio, not assessed: ethanol or drug abuse, 1 point: drug predisposing to bleeding, 1 point.

\*\*\*CKD was defined as eGFR<60mL/min/1.73m<sup>2</sup>

ACEi = angiotensin converting enzyme inhibitor; AF = atrial fibrillation; ARB = angiotensin II receptor blocker; BP = blood pressure; CCB = calcium channel blocker; CKD = chronic kidney disease; NOAC = non-vitamin K antagonist oral anticoagulant.

**Supplementary Figure S1.** Cumulative incidence of primary outcome in rhythm and rate control treatment groups before overlap weighting. Primary outcome was a composite of death from cardiovascular causes, stroke, or hospitalization with worsening of heart failure or acute coronary syndrome.

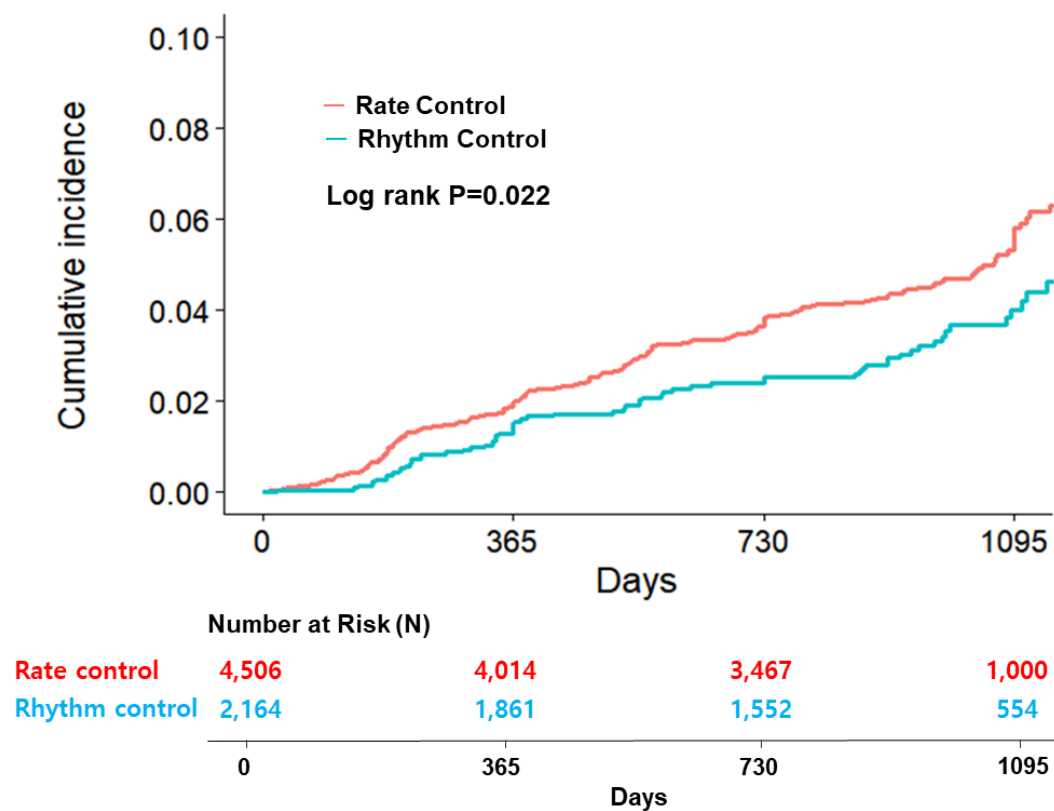

**Supplementary Figure S2.** Cumulative incidence of secondary outcomes in rhythm and rate control treatment groups before overlap weighting. Death from cardiovascular cause (A), Stroke (B), Hospitalization with worsening of heart failure (C), and Acute coronary syndrome (D).

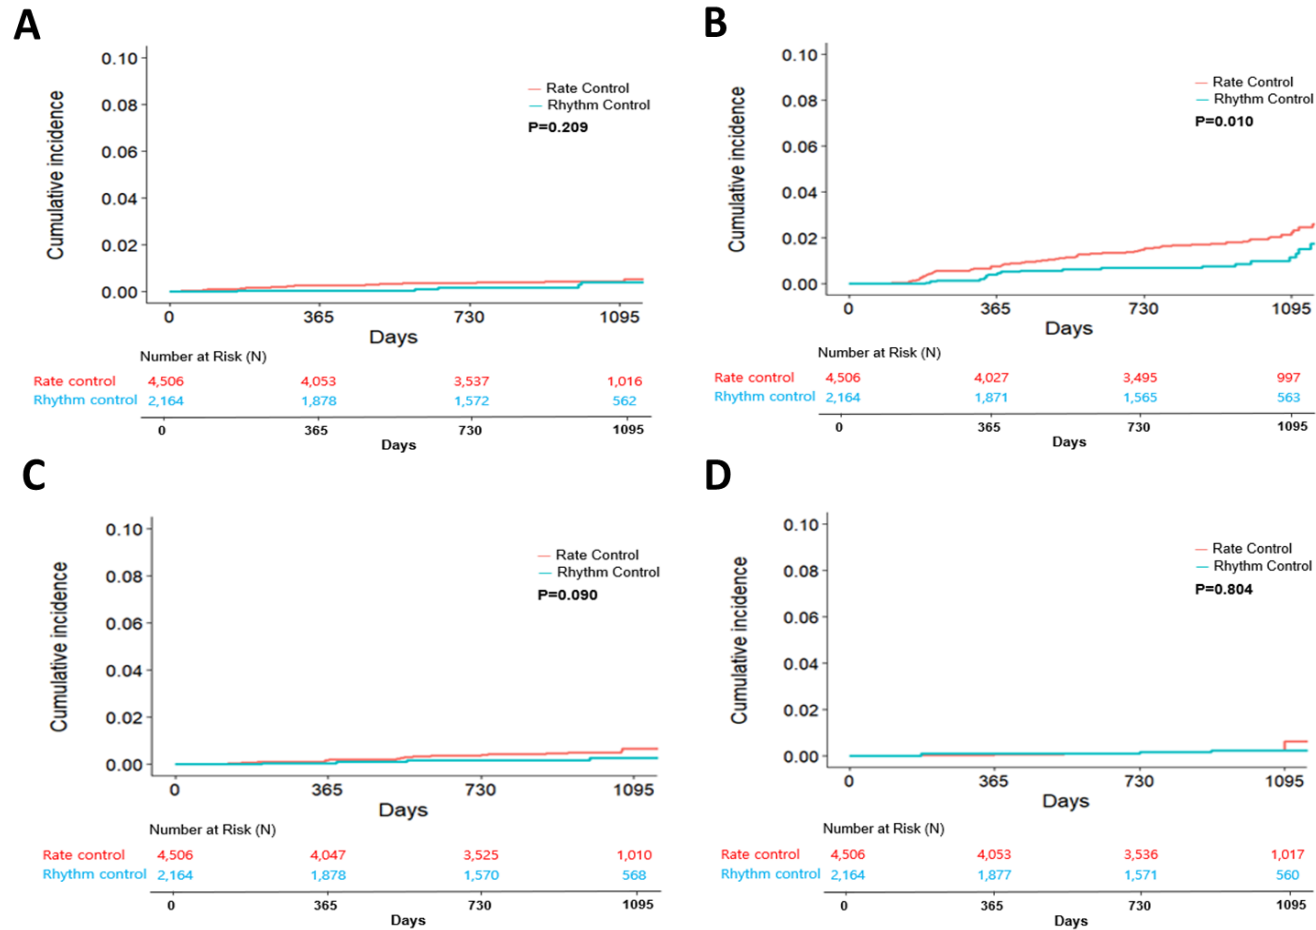

Supplement: s1 [file s1]
